# Supplementary material for: Colorimetric Detection of DNase Type I 3′OH DNA Ends Using an Isothermal Amplification-Assisted Paper-Based Analytical Device
Source: MDPI journal article supplement (doi:10.3390/bios12111012), 2022-11-13
Supplement: s1 [file s1]

## Supporting information

### Colorimetric Detection of DNase Type I 3'OH DNA Ends Using an Isothermal Amplification-Assisted Paper-Based Analytical Device

Wei Xue, Kaiyun Song, Yangyang Chang, and Meng Liu \*

Key Laboratory of Industrial Ecology and Environmental Engineering (Ministry of Education) and Dalian POCT Laboratory, School of Environmental Science and Technology, Dalian University of Technology, Dalian 116024, China

\* Correspondence: mliu@dlut.edu.cn

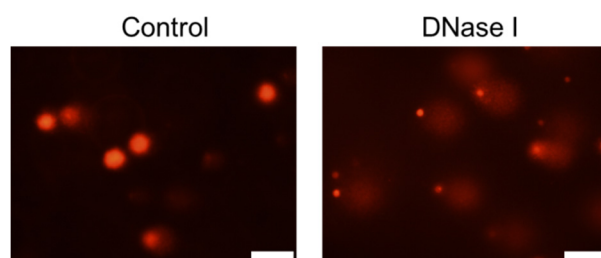

**Figure S1.** Traditional comet assay for examining DNA damage in ZFL cells. ZFL cells were first treated with or without DNase I at RT for 10 min. Scale bar: 50  $\mu$ m.

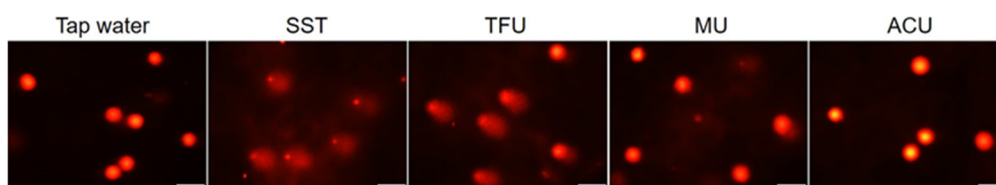

**Figure S2.** Traditional comet assay. Zebrafish are treated with effluent from different units of AWT. SST: secondary sedimentation tank; TFU: tertiary filtration unit; MU: membrane unit; ACU: activated carbon unit. Scale bar: 50  $\mu$ m.

**Table S1.** Comparison of Comet assay, traditional TUNEL and PAD assay for measuring DNA damages.

| Comet Assay       |        | TUNEL            |        | PAD         |        |
|-------------------|--------|------------------|--------|-------------|--------|
| Slide Preparation | 60 min | Fixation         | 20 min | Cell Lysis  | 5 min  |
| Lysis             | 90 min | Permeabilization | 10 min | Washing     | 2 min  |
| Washing           | 2 min  | Washing          | 2 min  | TUNEL       | 20 min |
| Electrophoresis   | 20 min | TUNEL            | 60 min | Washing     | 2 min  |
| Neutralization    | 15 min | Washing          | 2 min  | Cojugation  | 5 min  |
| DNA Staining      | 60 min | Cojugation       | 30 min | Washing     | 2 min  |
| Imaging           | 1 min  | Washing          | 2 min  | Colorimetry | 5 min  |
|                   |        | Colorimetry      | 15 min | Washing     | 2 min  |
|                   |        | Washing          | 2 min  | Imaging     | 1 min  |
|                   |        | Imaging          | 1 min  |             |        |
